# Supplementary material
Source: PubMed Central journal article supplement (PMC3349456)
Supplement: supp_111.032698_ajcn032698-ST1-ST4.pdf [file supp_111.032698_ajcn032698-ST1-ST4.pdf]

**Supplemental Table 2.** Plain water and other beverages intake trends during the follow-up

| Beverage intakes,<br>serving/d   | Time of follow-up |             |             |             |             |
|----------------------------------|-------------------|-------------|-------------|-------------|-------------|
|                                  | 1991              | 1995        | 1999        | 2003        | 2007        |
| Plain water                      | 2.74 ± 1.76       | 2.71 ± 1.92 | 2.72 ± 1.90 | 2.70 ± 1.88 | 2.70 ± 1.69 |
| Milk                             | 1.03 ± 0.87       | 1.06 ± 0.99 | 1.11 ± 1.02 | 1.15 ± 1.03 | 1.19 ± 0.94 |
| Coffee                           | 1.83 ± 1.58       | 1.63 ± 1.62 | 1.46 ± 1.61 | 1.34 ± 1.53 | 1.21 ± 1.32 |
| Sugar-sweetened<br>beverage      | 0.41 ± 0.67       | 0.48 ± 0.84 | 0.52 ± 0.91 | 0.55 ± 0.95 | 0.59 ± 0.88 |
| Artificial sweetened<br>beverage | 0.95 ± 1.14       | 1.02 ± 1.35 | 1.01 ± 1.37 | 1.03 ± 1.37 | 1.03 ± 1.23 |
| Tea                              | 0.66 ± 0.96       | 0.69 ± 1.10 | 0.69 ± 1.07 | 0.67 ± 1.04 | 0.65 ± 0.91 |
| Juice                            | 0.67 ± 0.71       | 0.71 ± 0.77 | 0.73 ± 0.83 | 0.75 ± 0.85 | 0.77 ± 0.78 |
| Total beverages                  | 8.29 ± 2.62       | 8.30 ± 3.03 | 8.49 ± 3.26 | 8.19 ± 3.06 | 8.13 ± 2.74 |

Data are expressed as Mean ± SD, and have been adjusted for age. The unit exchanges for beverages were shown below: 1 serving water = 1 cup/bottle (240 mL); 1 serving milk = 1 cup of milk (240 mL); 1 serving coffee = 1 cup (240 mL); 1 serving sugar-sweetened beverage = 1 glass, bottle, or can (330 mL); 1 serving juice = 1 small glass of apple, orange, grapefruit, tomato, or other fruit juice (120 mL); 1 serving wine = 4 oz (120 mL); 1 serving beer = 1 glass, bottle, or can (330 mL); 1 serving tea = 1 cup (240 mL).

**Supplemental Table 3.** Sensitivity analysis of the relative risk (95% CI) for type 2 diabetes according to intakes of plain water

|                                          | Frequency of consumption <sup>1</sup> |                   |                   |                   |                   | <i>P</i> -trend <sup>2</sup> |
|------------------------------------------|---------------------------------------|-------------------|-------------------|-------------------|-------------------|------------------------------|
|                                          | <1 cup/d                              | 1 cup/d           | 2-3 cups/d        | 4-5 cups/d        | ≥6 cups/d         |                              |
| Baseline water intake only               |                                       |                   |                   |                   |                   |                              |
| Cases/person-years                       | 560/235464                            | 305/159833        | 754/346637        | 580/207021        | 519/166473        |                              |
| Age and BMI-adjusted model               | 1.00                                  | 0.83 (0.72, 0.95) | 0.85 (0.76, 0.94) | 0.98 (0.87, 1.10) | 0.92 (0.81, 1.03) | 0.95                         |
| Multivariate-adjusted model <sup>3</sup> | 1.00                                  | 0.84 (0.73, 0.96) | 0.89 (0.80, 1.00) | 1.05 (0.93, 1.18) | 0.99 (0.87, 1.12) | 0.13                         |
| Most recent water intake                 |                                       |                   |                   |                   |                   |                              |
| Cases/person-years                       | 650/253288                            | 288/140550        | 695/321132        | 573/216475        | 512/183983        |                              |
| Age and BMI-adjusted model               | 1.00                                  | 0.92 (0.80, 1.05) | 0.89 (0.80, 0.99) | 0.99 (0.88, 1.11) | 0.94 (0.84, 1.05) | 0.75                         |
| Multivariate-adjusted model <sup>3</sup> | 1.00                                  | 0.94 (0.81, 1.08) | 0.93 (0.83, 1.04) | 1.05 (0.93, 1.18) | 1.00 (0.89, 1.13) | 0.41                         |
| Cumulative average without 4-y lag       |                                       |                   |                   |                   |                   |                              |
| Cases/person-years                       | 552/278643                            | 735/351075        | 1107/513873       | 554/231114        | 326/128578        |                              |
| Age and BMI-adjusted model               | 1.00                                  | 0.93 (0.83, 1.04) | 0.91 (0.82, 1.01) | 0.98 (0.87, 1.10) | 1.04 (0.91, 1.19) | 0.64                         |
| Multivariate-adjusted model <sup>3</sup> | 1.00                                  | 0.96 (0.86, 1.08) | 0.99 (0.89, 1.10) | 1.09 (0.97, 1.23) | 1.18 (1.02, 1.36) | 0.01                         |

<sup>1</sup>One cup = 240 mL.

<sup>2</sup>*P* for linear trend was calculated by treating plain water intake as a continuous variable.

<sup>3</sup>Multivariate-adjusted model: adjusted for age, race, family history of diabetes, BMI categories (<23.0, 23.0-24.9, 25.0-29.9, 30.0-34.9, or ≥35.0 kg/m<sup>2</sup>), smoking status (never, past, current [1-14, 15-24, or ≥25 cigarettes/d]), alcohol intake (never, <5.0, 5.0-15.0, or ≥15.0 g/d), menopausal status and hormone use, oral contraceptive use, physical activity level (<3.0, 3.0-8.9, 9.0-17.9, 18.0-26.9, or ≥27.0 h of metabolic equivalent tasks per wk), and Alternative Healthy Eating Index (quintile).

**Supplemental Table 4.** Relative risk (95% CI) for type 2 diabetes according to intakes of total and other beverages in the 4-y lagged analysis<sup>1</sup>

|                               | Frequency of consumption <sup>2</sup> |                   |                   |                   |                   | <i>P</i> -trend <sup>3</sup> | Relative risk for one serving/d |
|-------------------------------|---------------------------------------|-------------------|-------------------|-------------------|-------------------|------------------------------|---------------------------------|
|                               | ≤1 cup/wk                             | 2-4 cups/wk       | 5-7 cups/wk       | 2-3 cups/d        | ≥4 cups/d         |                              |                                 |
| Coffee                        | 1.00                                  | 0.93 (0.78, 1.11) | 0.96 (0.85, 1.09) | 0.78 (0.70, 0.86) | 0.66 (0.59, 0.74) | <0.001                       | 0.90 (0.87, 0.92)               |
| Milk                          | 1.00                                  | 0.97 (0.85, 1.10) | 0.99 (0.89, 1.11) | 0.97 (0.86, 1.09) | 0.88 (0.73, 1.08) | 0.06                         | 0.96 (0.92, 1.00)               |
| Tea                           | 1.00                                  | 0.99 (0.88, 1.11) | 1.13 (1.02, 1.26) | 1.15 (1.04, 1.28) | 1.16 (0.99, 1.35) | 0.01                         | 1.04 (1.01, 1.08)               |
| Artificial sweetened beverage | 1.00                                  | 0.89 (0.77, 1.02) | 0.92 (0.82, 1.04) | 1.04 (0.93, 1.15) | 1.03 (0.92, 1.16) | 0.04                         | 1.03 (1.00, 1.05)               |
| Sugar-sweetened beverage      | 1.00                                  | 1.10 (0.99, 1.22) | 1.22 (1.10, 1.36) | 1.34 (1.19, 1.51) | 1.29 (1.07, 1.54) | <0.001                       | 1.09 (1.05, 1.14)               |
| Fruit juices                  | 1.00                                  | 1.02 (0.91, 1.14) | 1.13 (1.02, 1.26) | 1.25 (1.11, 1.41) | 1.30 (0.98, 1.71) | <0.001                       | 1.11 (1.05, 1.17)               |
|                               | <6 cups/d                             | 6-8 cups/d        | 8-10 cups/d       | 10-12 cups/d      | ≥12 cups/d        |                              |                                 |
| Total beverage                | 1.00                                  | 0.92 (0.82, 1.03) | 0.99 (0.88, 1.11) | 0.92 (0.80, 1.04) | 1.06 (0.92, 1.23) | 0.89                         | 1.00 (0.99, 1.02)               |

<sup>1</sup>The results were adjusted for age, race, family history of diabetes, BMI categories (<23.0, 23.0-24.9, 25.0-29.9, 30.0-34.9, or ≥35.0 kg/m<sup>2</sup>), smoking status (never, past, current [1-14, 15-24, or ≥25 cigarettes/d]), alcohol intake (never, <5.0, 5.0-15.0, or ≥15.0 g/d), menopausal status and hormone use, oral contraceptive use, physical activity level (<3.0, 3.0-8.9, 9.0-17.9, 18.0-26.9, or ≥27.0 h of metabolic equivalent tasks per wk), and Alternative Healthy Eating Index (quintile).

<sup>2</sup>One cup = 240 mL.

<sup>3</sup>*P* for linear trend was calculated by treating the beverage intake as a continuous variable.
